# Supplementary material
Source: publisher site journal article supplement (https://www.spandidos-publications.com/627/downloadSupplementary)

Figure S1. miR-125b overexpression in GBS-SD and SGC-996 cells. miR-125b expression levels in (A) GBC-SD and (B) SGC-996 cell transfected with Ctrl-mimics or miR-125b-mimics. U6 was used as the internal control. \*\*\*P<0.001.

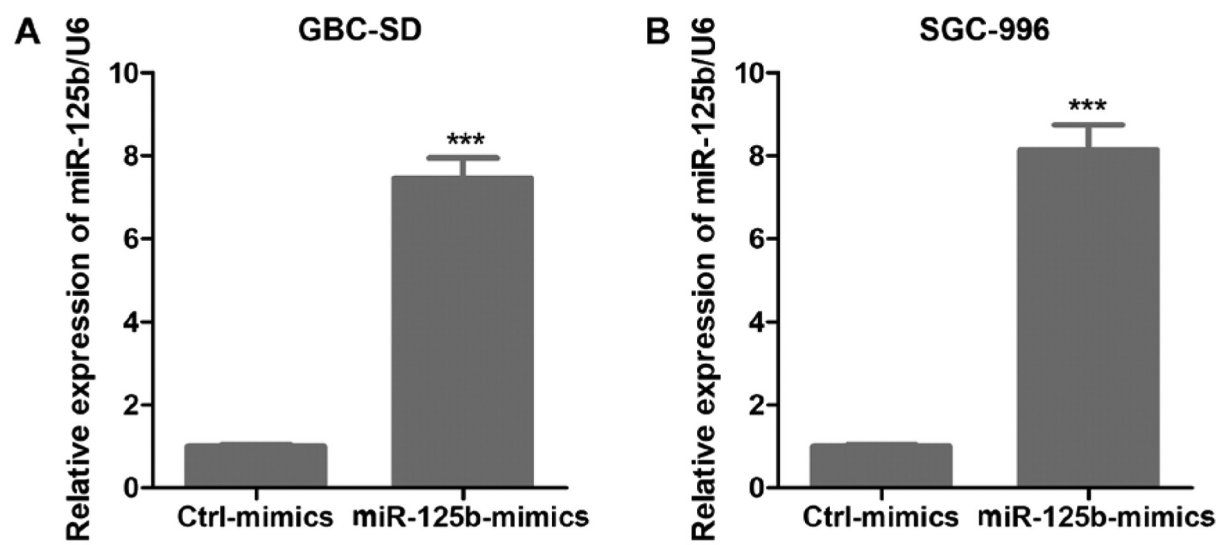

Supplement: Supplementary file 1 [file downloadSupplementary]
